# Supplementary material for: The potential impact of new Andean dams on Amazon fluvial ecosystems
Source: PLoS One. 2017 Aug 23;12(8):e0182254. doi: 10.1371/journal.pone.0182254 (PMC5568116; doi:10.1371/journal.pone.0182254)
Supplement: S1 Table — Flooded areas simulated using the MGB-IPH Large Scale Numerical Hydrological Model, developed specifically for the Amazon Basin [67, 68]. Fisheries data supplied by DIREPRO (Dirección Regional de Producción, Peru). TY = total annual fish yield, tons y-1; YFZ = annual fish yield for regularly exploited fishing zones, tons y-1; FZ = number of fishing zones. FZ was assumed to represent fishing effort. Mifa = minimum annual flooded area, km2; Mxfa = maximum annual flooded area, km2. (XLSX) [file pone.0182254.s003.xlsx]

## Sheet: Plan1
	Fisheries and Flooding Statistics for the Loreto Fishing Region of Peru
YEAR	TY	YFZ	FZ	Mxfa	Mifa
1999	n.a	n.a.	n.a.	32689	12530.2
2000	14982.5	n.a.	562	31431.9	14410
2001	14893	n.a.	588	26724.4	12568.8
2001	9752.86	n.a.	541	27548.7	13607.5
2003	9369.48	n.a.	447	27401.5	15676.6
2004	16332.4	12240.4	599	25297.9	14834.5
2005	16175.1	11114	489	29460.2	12532.9
2006	11938.2	9240.45	486	32850.5	14707.1
2007	13675.7	10975.4	551	32126.8	12592.4
2008	20903.2	15862.5	550	37173.8	14291.6
2009	27777	20483.2	559	30140.2	13134.4
2010	29332	23668.1	469	26909.2	11118.7
2011	19089.6	15092.3	491	23761	n.a
	TY = Total Annual Fish Yield, tons/ y
	YFZ = Annual fish yiel in regularly exploited fishing zones
	FZ = number of fishing zones
	Mxfa = maximum annual flooded area, km2
	Mifa = minimum annual flooded area, km2
